# Supplementary material for: The Release of Inflammatory Mediators from Acid-Stimulated Mesenchymal Stromal Cells Favours Tumour Invasiveness and Metastasis in Osteosarcoma
Source: MDPI journal article supplement (doi:10.3390/cancers13225855), 2021-11-22
Supplement: s1 [file s1]

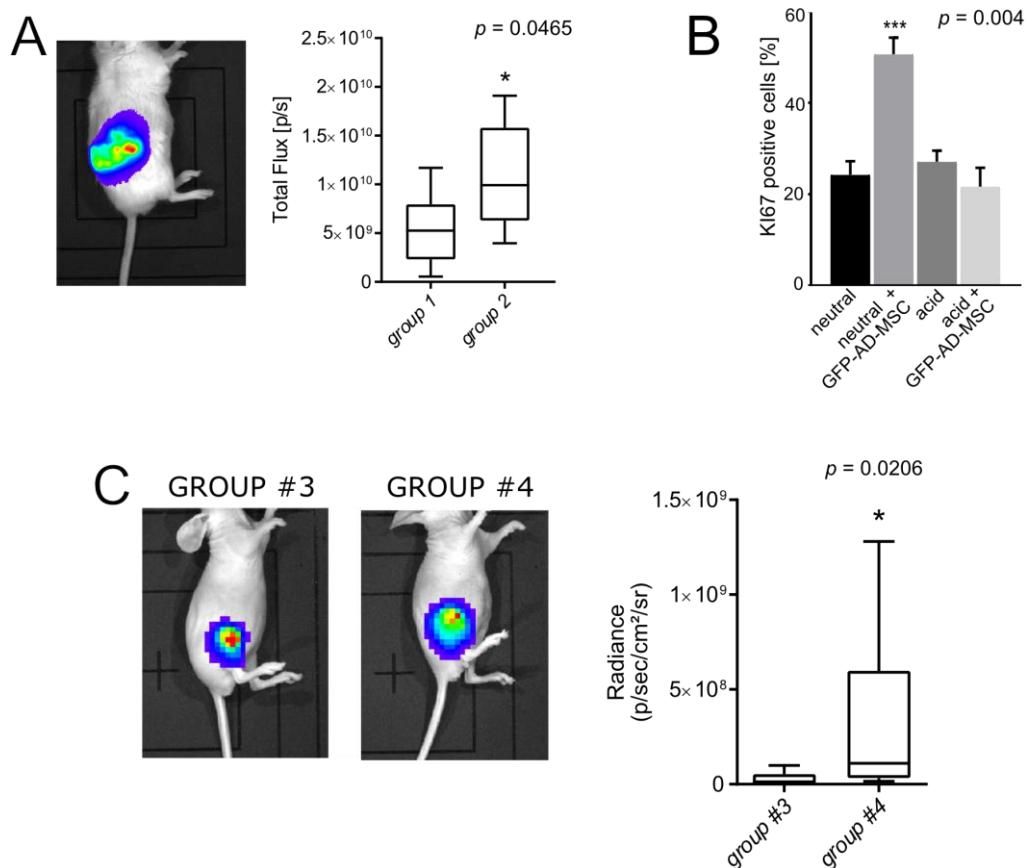

**Figure S1. GFP-AD-MSC enhance tumour growth with an acid-independent mechanism.** (a) Left panel: representative image of luciferase assay in a subcutaneously injected OS xenograft after 15 days; right panel: tumour growth in group #1 and #2 of the animal trial n. 2 (see Table 2), as measured by the Total flux ( $n = 6$ ,  $*p < 0.05$ , Mann Whitney U test, median and percentiles are shown); (b) n. of Ki67 positive cells that were also negative for GFP, in luc-143b spheroids, enriched or not with GFP-AD-MSC, and cultured in medium at different pH ( $n = 6$ ,  $***p < 0.001$ , Mann Whitney U test, mean  $\pm$  SEM); (c) Left panel: representative images of luciferase assay in a intratibially injected OS xenografts after 15 days; right panel: tumour growth in the tibia in the group #3 and #4 of the animal trial n. 6 (see Table 2) at 8 days, as measured by the Total flux ( $n = 6$ ,  $*p < 0.05$ , Mann Whitney U test, median and percentiles are shown).

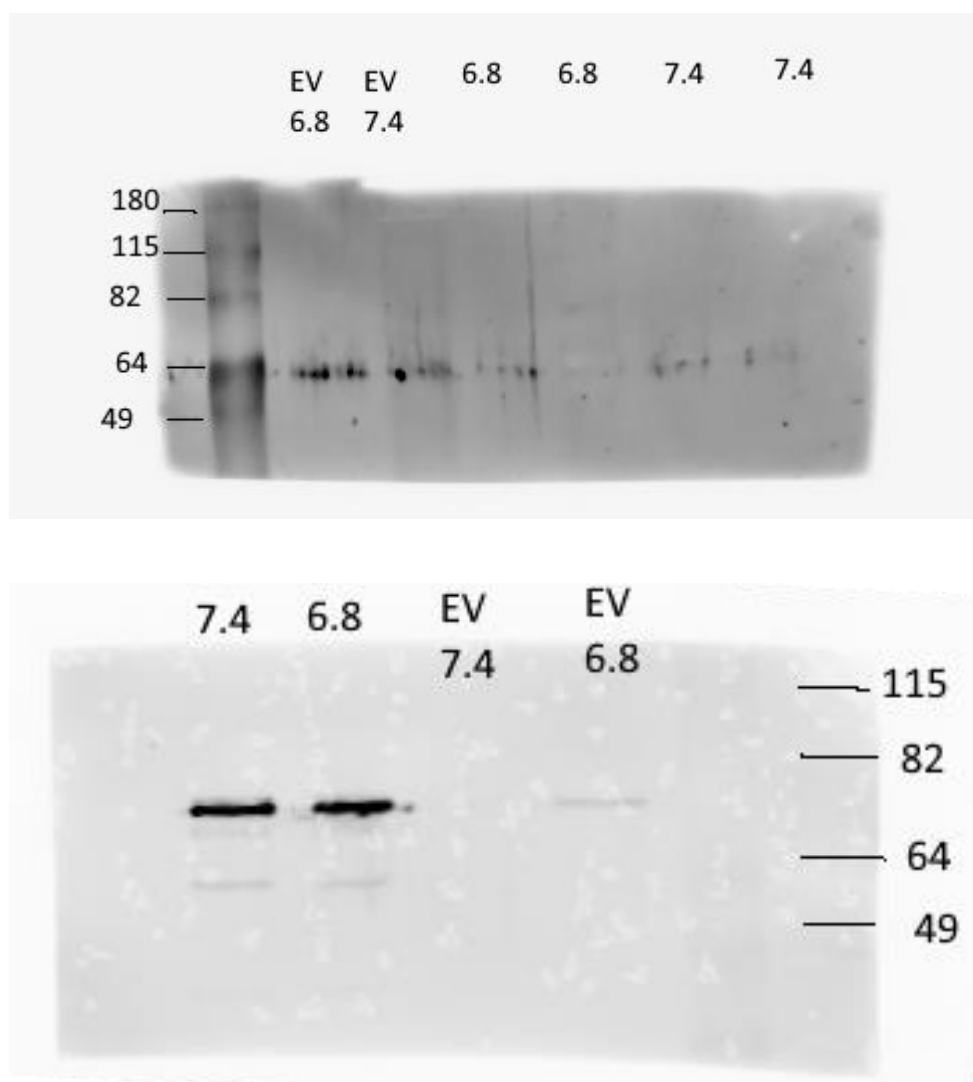

**Figure S2: Original Images of Western Blot analysis of Fig. 1G.**

Table S1. List of primers.

| Definition                                                                                                                              | Locus     | Reference<br>GeneBank | Forward                           | Reverse                     | Aplicon<br>Length |
|-----------------------------------------------------------------------------------------------------------------------------------------|-----------|-----------------------|-----------------------------------|-----------------------------|-------------------|
| Human 18S ribosomal                                                                                                                     | X03205    | X03205.1 X03205       | 5'-gcaattattcccatgaacg-3'         | 5'-gggacttaatcaacgcaagc-3'  | 68 nt             |
| Homo sapiens<br>glyceraldehyde-3-<br>phosphate<br>dehydrogenase<br>(GAPDH)                                                              | NM_002046 | NM_002046.3           | 5'-agccacatcgctcagacac-3'         | 5'-gcccaatacgaccaaattcc-3'  | 66 nt             |
| Homo sapiens tyrosine 3-<br>monooxygenase/tryptop<br>han 5-monooxygenase<br>activation protein zeta<br>(YWHAZ), transcript<br>variant 1 | NM_003406 | NM_003406.3           | 5'-ccgttacttggtgaggttg-3'         | 5'-tgcttggtgtgactgatcgac-3' | 67 nt             |
| Human beta-<br>glucuronidase (GUSB)                                                                                                     | HUMGLCB   | M15182.1 M15182       | 5'-cgccctgcctatctgtattc-3'        | 5'-tccccacaggagtggtgtag-3'  | 91 nt             |
| Homo sapiens ATPase<br>H <sup>+</sup> transporting V1<br>subunit B2 (ATP6V1B2)                                                          | NM_001693 | NM_001693.3           | 5'-tgccgaagacttccttg-3'           | 5'-ccgaaatgccagtctgaatc-3'  | 90 nt             |
| Homo sapiens<br>interleukin 6 (IL6)                                                                                                     | NM_000600 | NM_000600.3           | 5'-gatgagtacaaaagtctgatcca-<br>3' | 5'-ctgcagccactggttctgt-3'   | 130 nt            |
